# Supplementary material
Source: PubMed Central journal article supplement (PMC1347396)
Supplement: nar_34_suppl-1_D398__1.pdf [file nar_34_suppl-1_D398__1.pdf]

## Supplementary Figure 1

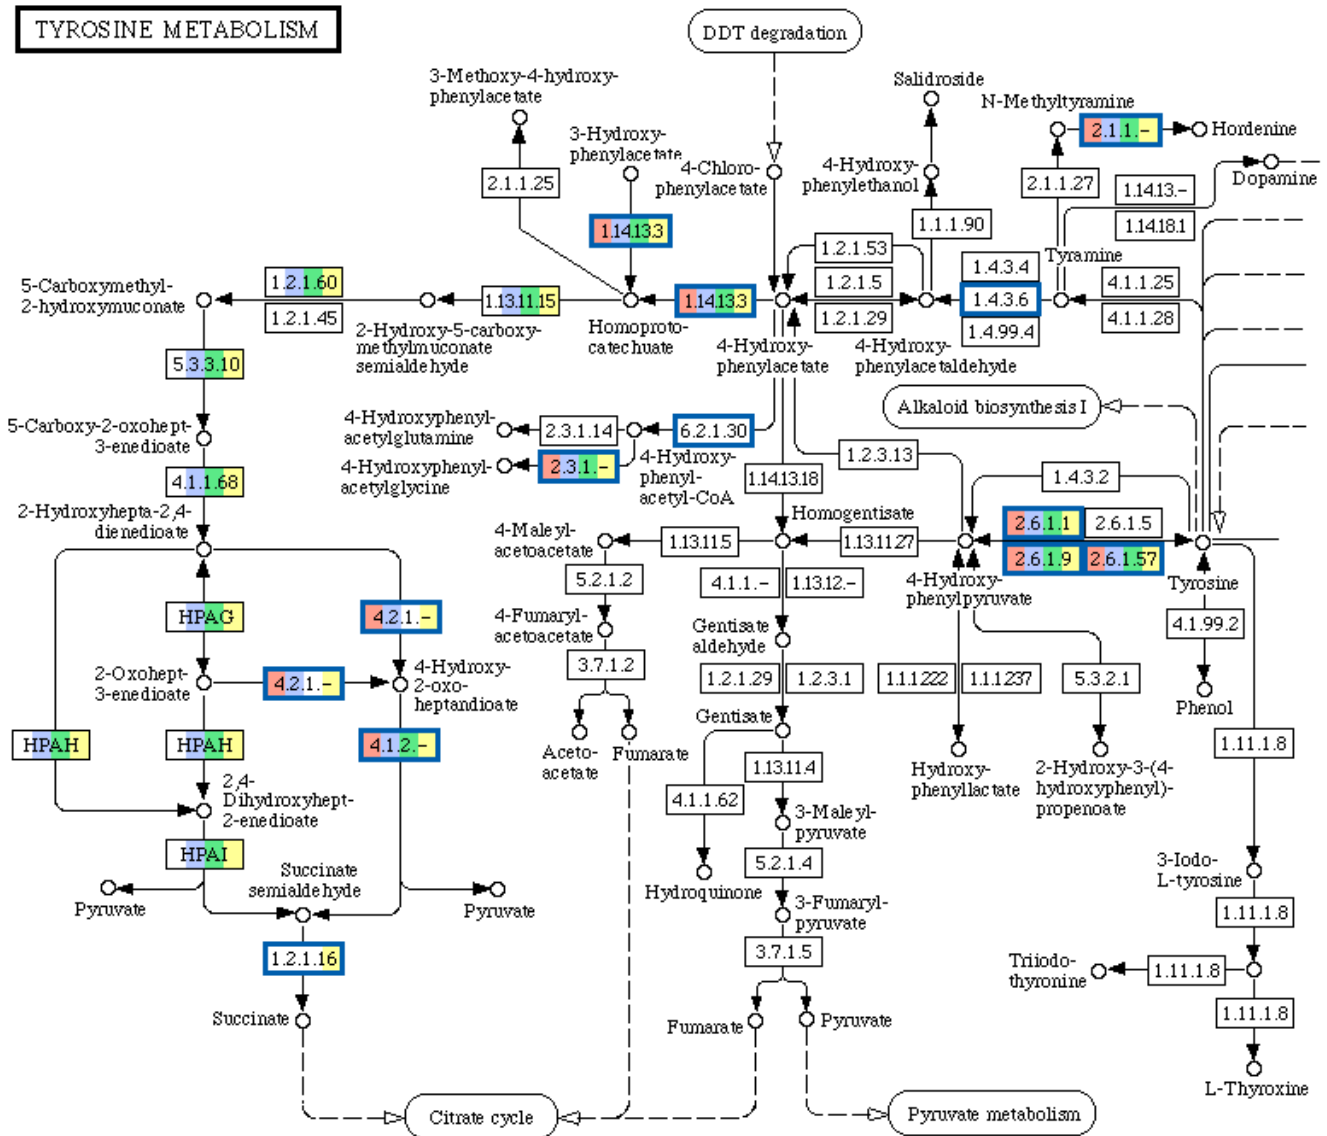

Supplementary Fig. 1. Comparative metabolic pathway map of *Shigella*. This is a portion of the tyrosine degradation map. Reactions highlighted with colored bars indicate that the corresponding enzymes were present in Sd197 (red), Sf301 (blue), Sb227 (green) or Ss046 (yellow). Enzymes also present in *E. coli* K12 MG1655 were indicated by thick dark blue border of the corresponding box. The *hpa* genes presented in Sf301, Sb227 and Ss046 offer them the pathway to degrade aromatic compound 4-hydroxyphenylacetate (on the top left).
